# Supplementary material
Source: publisher figshare collection journal article supplement (https://diabetesjournals.figshare.com/articles/dataset/_/19098803)
Supplement: Supplementary file 1 [file 1]

## **Online supplemental/appendix file**

### **Diabetes-induced Cellular Senescence and Senescence-Associated Secretory Phenotype Impair Cardiac Regeneration and Function Independently of Age**

**Fabiola Marino<sup>1,2,#</sup>, Mariangela Scalise<sup>1#</sup>, Nadia Salerno<sup>3</sup>, Luca Salerno<sup>1</sup>, Claudia Molinaro<sup>3</sup>, Donato Cappetta<sup>4</sup>, Michele Torella<sup>5</sup>, Marta Greco<sup>1</sup>, Daniela Foti<sup>1</sup>, Ferdinando C. Sasso<sup>5</sup>, Pasquale Mastroroberto<sup>1</sup>, Antonella De Angelis<sup>4</sup>, Georgina M. Ellison-Hughes<sup>6</sup>, Maurilio Sampaolesi<sup>2</sup>, Marcello Rota<sup>7</sup>, Francesco Rossi<sup>4</sup>, Konrad Urbanek<sup>1</sup>, Bernardo Nadal-Ginard<sup>3</sup>, Daniele Torella<sup>1\*</sup>, Eleonora Cianflone<sup>3,7\*</sup>**

# Supplementary Figure 1

A

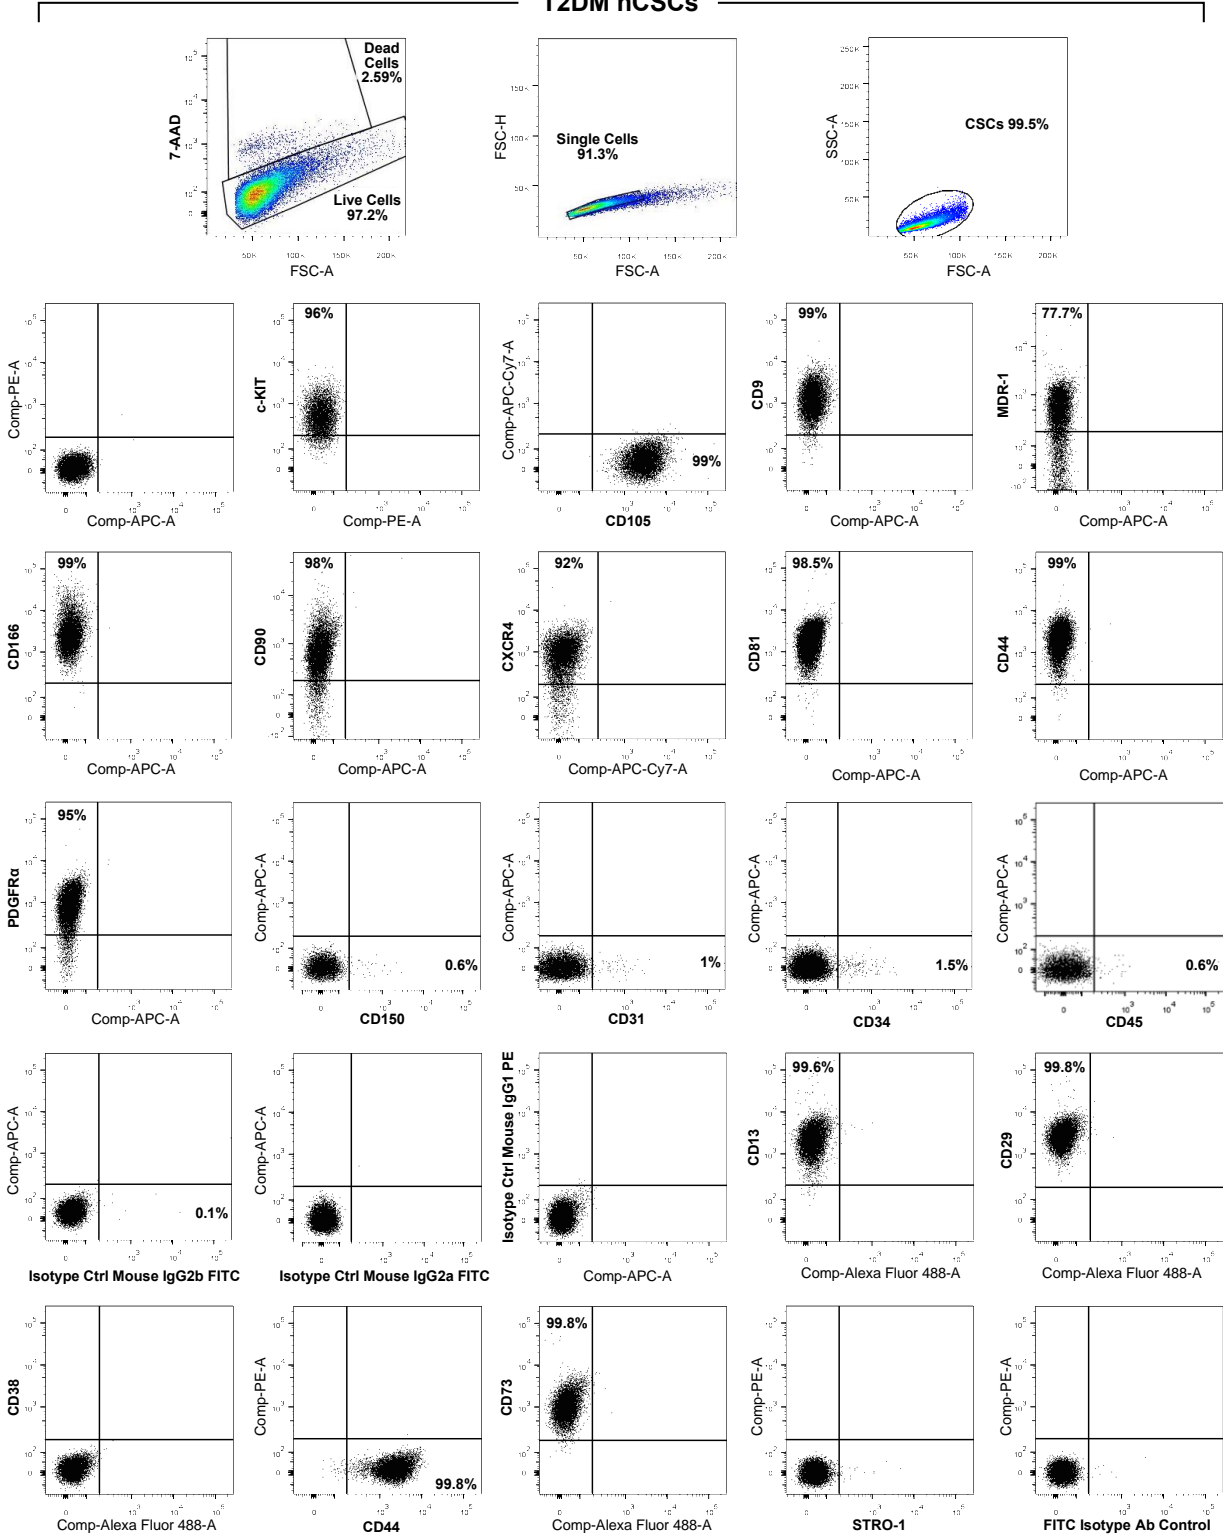

B

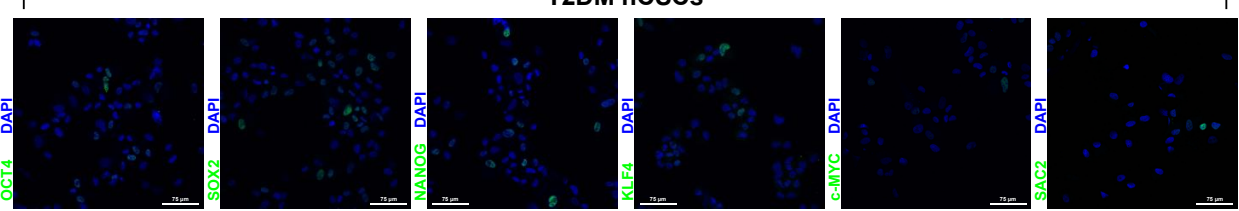

**Supplementary Figure 1.** (A) Flow cytometry dot plots showing the gating strategy used to evaluate the membrane phenotype of c-kit<sup>pos</sup>CD45<sup>neg</sup>CD31<sup>neg</sup> T2DM-hCSCs and their differential surface marker expression (Representative of n=3 biological replicates). (B) Representative confocal microscopy images from cytopsin preparation of c-kit<sup>pos</sup>CD45<sup>neg</sup>CD31<sup>neg</sup> T2DM-hCSCs expressing the pluripotency markers OCT4, SOX2, NANOG, KLF4, cMYC and Sac. Scale bar=75μm. (OCT4, SOX2, NANOG, KLF4, cMYC, Sac2, green; DAPI, blue; Representative of n=3 number of biological replicates). All data are mean±S.D

## Supplementary Figure 2

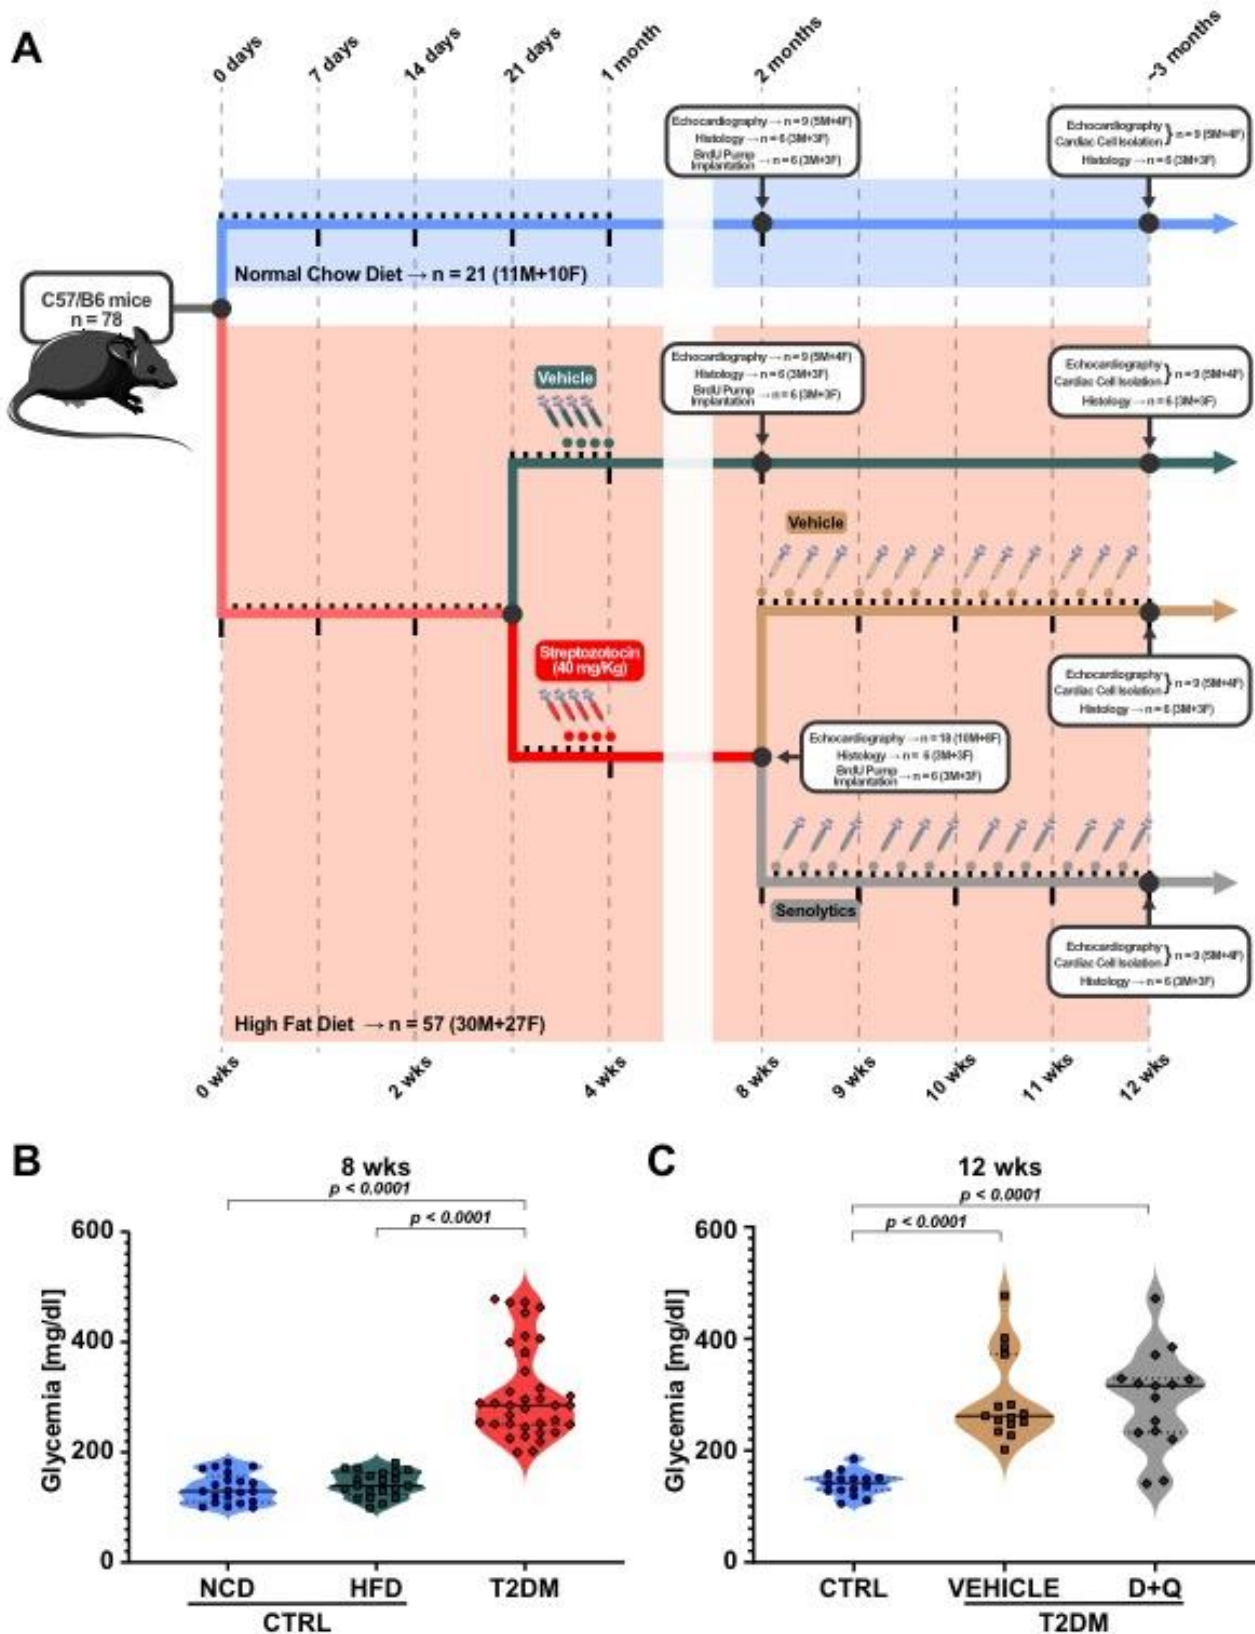

**Supplementary Figure 2.** (A) Schematic representation of the *in vivo* study. (B) Violin plots showing the measurements of glycemia respectively at 8 weeks in CTRL (NCD and HFD) and T2DM mice and T2DM (NCD, n=21 ; HFD, n=21; T2DM, n=36), and at 12 weeks in CTRL, Vehicle and D+Q treated mice (CTRL, n=15; Vehicle, n=15; D+Q, n=15).

## Supplementary Figure 3

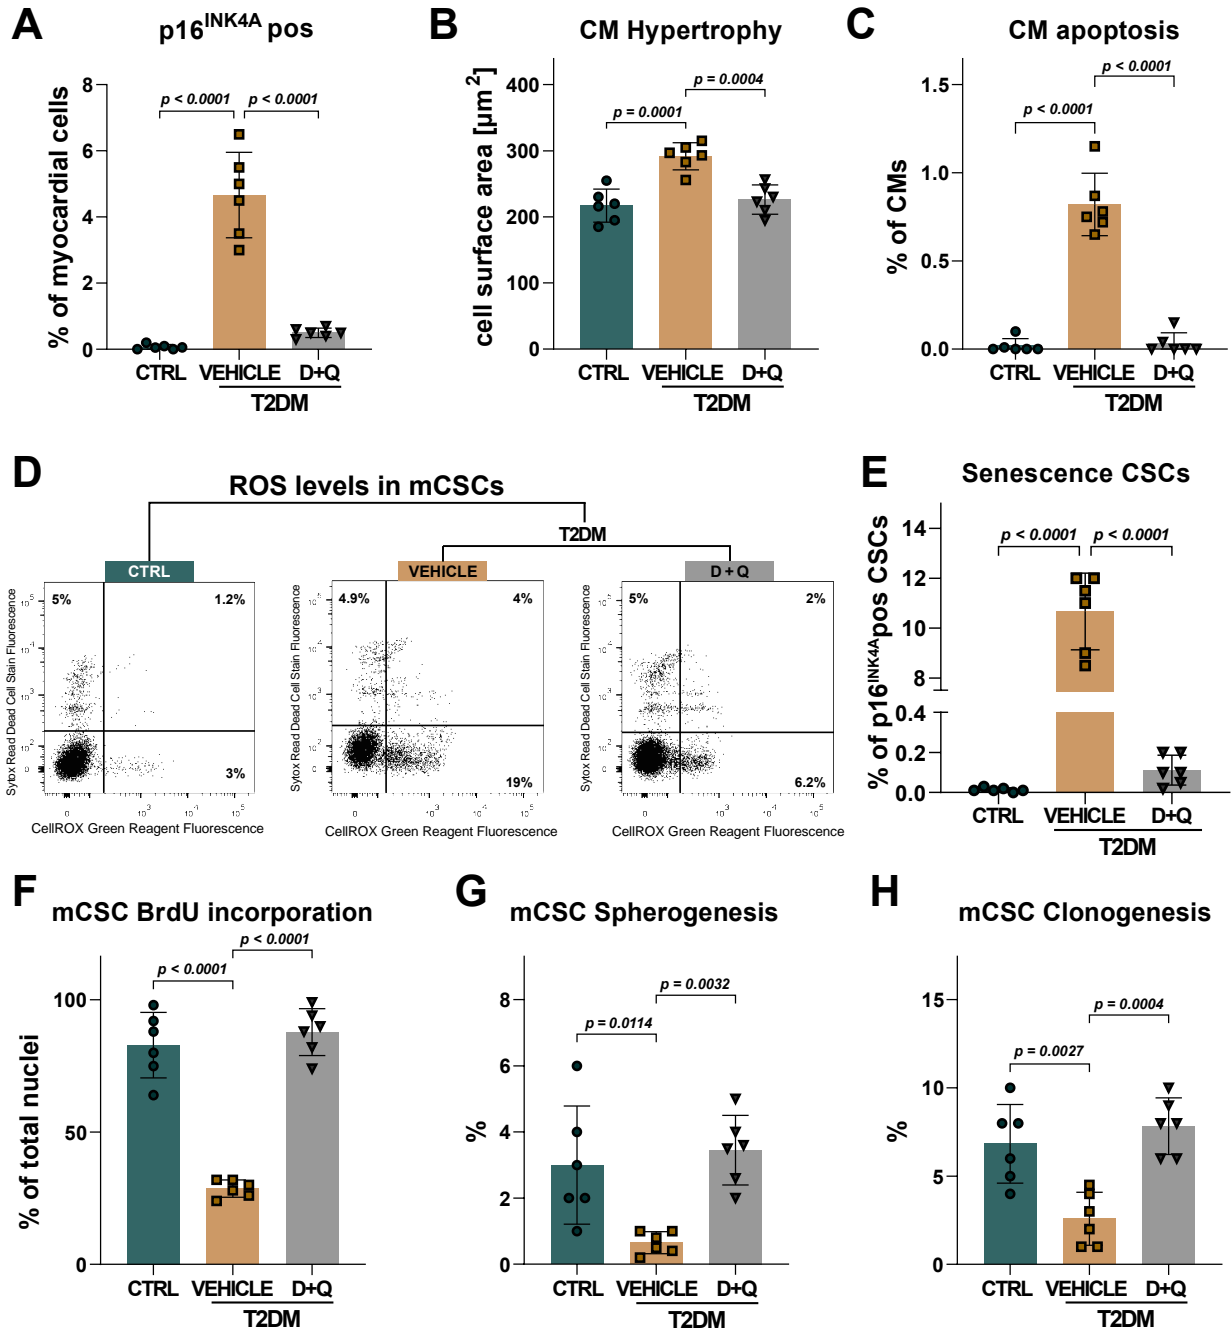

**Supplementary Figure 3.** (A-C) Bar graphs showing the percentage of myocardial cells  $p16^{INK4a}$  positive (A), CM size and hypertrophy (B), apoptotic TdT positive cardiomyocytes (C) in T2DM mice treated with D+Q senolytic combination compared to vehicle treated mice and CTRL mice. (n=6 biological replicates). (D) The ROS levels were assessed by determining CellROX fluorescence intensity by flow cytometry on CSCs obtained from CTRL, vehicle or D+Q-treated T2DM mice (Representative of n=3 biological replicates). (E) Bar graphs showing the percentage of CSCs  $p16^{INK4a}$  positive in T2DM mice treated with D+Q senolytic combination compared to vehicle treated mice and CTRL mice. (n=6 biological replicates). (F-H) Bar graphs showing the *in vitro* proliferation potential (F) spherogenesis (G) and clonogenesis (H) of CSCs isolated from vehicle or D+Q-treated T2DM mice compared to CSCs from CTRL mice (n=6 biological replicates). All data are mean $\pm$ S.D

**Supplementary Table 1. Characteristics of the Patients Enrolled in the Study**

|                         | T2DM Patients<br>n=16 | NDM Patients<br>n=12 |       |
|-------------------------|-----------------------|----------------------|-------|
| Sex, M/F                | 14/2                  | 11/1                 | 0.54  |
| Age, y                  | 59.4±4.0              | 59.4±4.1             | 0.97  |
| Duration of diabetes, y | 7.3±4.3               | -                    |       |
| BMI, kg/m <sup>2</sup>  | 27.7±3.1              | 28.8±3.5             | 0.39  |
| HbA <sub>1c</sub> , %   | 9.1±3.8               | -                    |       |
| FBG, mg/dl              | 166.4±64.1            | 92.7±9.3             | <0.01 |
| LDL cholesterol, mg/dl  | 108.6±48.3            | 118.4±43.1           | 0.58  |
| HDL cholesterol, mg/dl  | 41±15.4               | 47.2±17.0            | 0.33  |
| TG, mg/dl               | 168.9±106.5           | 139.7±67.4           | 0.38  |
| SBP, mm Hg              | 133.6±14.7            | 131.2±19.0           | 0.75  |
| DBP, mm Hg              | 79.2±9.1              | 79.7±11.0            | 0.91  |
| Three-vessel CHD, n     | 8                     | 8                    | 0.67  |
| Two-vessel CHD, n       | 5                     | 4                    | 0.92  |
| Therapy, n              |                       |                      |       |
| Statins                 | 16                    | 12                   |       |
| Aspirin                 | 16                    | 12                   |       |
| β-Blockers              | 16                    | 10                   | 0.31  |
| ACEIs/ARBs              | 16                    | 10                   | 0.29  |
| Nitrates                | 0                     | 0                    |       |

Quantitative data are expressed as mean±SD. Binary data are reported by counts. \*P<0.01 vs DM patients. Comparisons of the quantitative data have been made through use of Student's t test for independent samples. The  $\chi^2$  test was used to compare binary data. T2DM indicates Type 2 Diabetes Mellitus; NDM non diabetes Mellitus; BMI body mass index; FBG, fasting blood glucose; LDL, low-density lipoprotein; HDL, high-density lipoprotein; TG, triglycerides; SDP, systolic blood pressure; DBP, diastolic blood pressure; CHD, coronary heart disease; ACEI, angiotensin-converting enzyme-inhibitor; ARB, angiotensin II receptor blocker.

**Supplementary Table 2: Antibodies**

| Antigen         | Antibody ID | Company            | Application |
|-----------------|-------------|--------------------|-------------|
| c-kit           |             | Dako               | IF          |
| c-kit           |             | SantaCruz Biotech  | IF          |
| p16             |             | SantaCruz Biotech  | IF, WB      |
| p53             |             | SantaCruz Biotech  | WB          |
| p21             |             | SantaCruz Biotech  | WB          |
| p21             |             | Abcam              | IF, IHC     |
| 8-OH            |             | Origene            | IF          |
| 3-NT            |             | Thermo Fisher      | IF, IHC     |
| 4-HNE           |             | Abcam              | IF, IHC     |
| cTNI            |             | Abcam              | IF          |
| g-H2AX          |             | Cell Signaling     | IF          |
| cTNI            |             | Abcam              | IF          |
| Actinin         |             | Abcam              | IF          |
| WGA             |             | Thermo Fisher      | IF          |
| BrdU            |             | Roche              | IF          |
| PCM1            |             | AtlasAntibodies    | IF          |
| TdT             |             | Invitrogen         | IF          |
| Oct-4           |             | SantaCruz Biotech  | IF          |
| Nanog           |             | R&D Systems        | IF          |
| Klf-4           |             | Invitrogen         | IF          |
| Sox-2           |             | SantaCruz Biotech  | IF          |
| Sac-2           |             | SantaCruz Biotech  | IF          |
| Gapdh           |             | Bioss              | WB          |
| c-kit           | A3C6E2      | Miltenyi Biotec    | FC          |
| CD184 (CXCR4)   | 12G5        | Miltenyi Biotec    | FC          |
| CD9             | SN4 C3-3A2  | Miltenyi Biotec    | FC          |
| CD44            | DB105       | Miltenyi Biotec    | FC          |
| CD81            | 5A6         | BioLegend          | FC          |
| CD90            | DG3         | Miltenyi Biotec    | FC          |
| CD166           | 3A6         | BioLegend          | FC          |
| CD105           | 43A4E1      | Miltenyi Biotec    | FC          |
| MDR-1           | UIC2        | BioLegend          | FC          |
| PDGFR- $\alpha$ | 16A1        | BioLegend          | FC          |
| CD150           | REA151      | Miltenyi Biotec    | FC          |
| CD31            | AC128       | Miltenyi Biotec    | FC          |
| CD45            | REA747      | Miltenyi Biotec    | FC          |
| CD73            | AD2         | Miltenyi Biotec    | FC          |
| CD38            | HIT2        | BD Pharmigen       | FC          |
| CD29            | TS2/16      | Miltenyi Biotec    | FC          |
| CD44            | DB105       | Miltenyi Biotec    | FC          |
| CD13            | REA263      | Miltenyi Biotec    | FC          |
| STRO-1          |             | Santa Cruz Biotech | FC          |
| CD34            | AC136       | Miltenyi Biotec    | FC          |

|                                        |  |                 |    |
|----------------------------------------|--|-----------------|----|
| Mouse IgG1 - Isotype control antibody  |  | Miltenyi Biotec | FC |
| Mouse IgG2a - Isotype control antibody |  | Miltenyi Biotec | FC |
| Mouse IgG2b - Isotype control antibody |  | Miltenyi Biotec | FC |
| AlexaFluor488 anti-mouse IgG           |  | Invitrogen      | FC |

*FC denotes Flow Cytometry, IF denotes Immunofluorescence, WB denotes Western Blot and IHC denotes Immunoistochemistry*



**Table 3. RT-PCR Primers****Taqman Primers List**

| GENE    | SPECIES | ID NUMBER     |
|---------|---------|---------------|
| hGAPDH  | Human   | Hs02758991_g1 |
| hMEF2C  | Human   | Hs00231149_m1 |
| hGata4  | Human   | Hs00171403_m1 |
| hNkx2.5 | Human   | Hs00231763_m1 |
| hMyh6   | Human   | Hs01101425_m1 |
| hMyh7   | Human   | Hs01110632_m1 |
| hTnnt2  | Human   | Hs00165960_m1 |
| hACTC1  | Human   | Hs01109515_m1 |
| hCCL2   | Human   | Hs00234140_m1 |
| hIL-8   | Human   | Hs00174103_m1 |
| hGM-CSF | Human   | Hs00929873_m1 |
| hIGFBP5 | Human   | Hs00181213_m1 |
| hIL-6   | Human   | Hs00174131_m1 |
| hPAI-1  | Human   | Hs00167155_m1 |
| hMMP-3  | Human   | Hs00968305_m1 |
| hCCL11  | Human   | Hs00237013_m1 |
| Gapdh   | Mouse   | Mm99999915_g1 |
| Mef2c   | Mouse   | Mm01340842_m1 |
| Nkx2.5  | Mouse   | Mm01309813_s1 |
| Gata4   | Mouse   | Mm00484689_m1 |
| c-kit   | Mouse   | Mm00445212_m1 |
| Myh7    | Mouse   | Mm01319006_g1 |
| Myl2    | Mouse   | Mm00440384_m1 |
| TnnT2   | Mouse   | Mm01290256_m1 |
| Actc1   | Mouse   | Mm01333821_m1 |

**List of mouse gene-specific primer sets for SYBR Green qPCR**

| GENE         | Forward Primer                | Reverse Primer                            |
|--------------|-------------------------------|-------------------------------------------|
| MCP1 (CCL2)  | 5'-GCTACAAGAGGATCACCAGCAG-3'  | 5'-GTCTGGACCCATTCCTTCTTGG-3'              |
| IGFBP5       | 5'-AACGAAAAGAGCTACCGCGA-3'    | 5'-CCGACAAACTTGGACTGGGT-3'                |
| PAI-1        | 5'-GGCCATTACTACGACATCCTG-3'   | 5'-GGTCATGTTGCCTTTCCAGT-3'                |
| GM-CSF       | 5'-AACCTCCTGGATGACATGCCTG-3'  | 5'-AAATTGCCCCGTAGACCCTGCT-3'              |
| IL-8         | 5'-GTGCAGTTTTGCCAAGGAGT-3'    | 5'-TTATGAATTCTCAGCCCTCTTCAAAAAC TT CTC-3' |
| CCL11        | 5'-TGCAGAGCTCCACAGCGCTT-3'    | 5'-GGGTGAGCCAGCACCTGGGA-3'                |
| IL-6         | 5'-TGAGAAAAGAGTTGTGCAATGG-3'  | 5'-GGTACTCCAGAAGACCAGAGG-3'               |
| MMP-3        | 5'-GTTGGAGAACATGGAGACTTTGT-3' | 5'-CAAGTTCATGAGCAGCAACCA-3'               |
| IL1a         | 5'-AGGGAGTCAACTCATTGGCG-3'    | 5'-TGGCAGAACTGTAGTCTTCGT-3'               |
| IL1b         | 5'-TGCCACCTTTTGACAGTGATG-3'   | 5'-TGATGTGCTGCTGCGAGATT-3'                |
| TNF $\alpha$ | 5'-GCAGGTTCTGTCCCTTTCAC-3'    | 5'-GTCGCGGA TCA TGCTTTCTG-3'              |

**Supplementary Table 4. Echocardiography data**

**Supplementary Table 4. Echocardiography data for figures 7-8.**

|                      | Sex    | BW (gr) | LVEDD (mm) | LVESD (mm) | EF (%)      | FS (%)      | HR (bpm) | E velocity mm/s | A velocity    | E/A        | E' velocity | E/E'        |
|----------------------|--------|---------|------------|------------|-------------|-------------|----------|-----------------|---------------|------------|-------------|-------------|
| <u>8 weeks</u>       |        |         |            |            |             |             |          |                 |               |            |             |             |
| <b>NCD</b>           | 5M+4F  | 21±0.5  | 3.84±0.17  | 2.70±0.13  | 57.26±3.57  | 29.63±2.37  | 449±49   | 585.56±67.20    | 307.22±62.4   | 1.94±0.29  | 22.28±2.57  | 26.70±1.75  |
| <b>HFD</b>           | 5M+4F  | 25±2*   | 3.79±0.32  | 2.53±0.36  | 62.56±7.21  | 33.52±5.46  | 416±28   | 566.08±79.63    | 298.63±90.43  | 2.00±0.46  | 21.63±3.5   | 26.39±2.9   |
| <b>T2DM</b>          | 10M+8F | 22±1    | 3.895±0.34 | 2.77±0.39  | 56.28±7.28  | 29.145±4.84 | 425±55   | 550.048±103.56  | 349.79±116.22 | 1.72±0.58  | 15.89±4.45* | 36.29±9.41# |
| <u>12 weeks</u>      |        |         |            |            |             |             |          |                 |               |            |             |             |
| <b>CTRL (HFD)</b>    | 5M+4F  | 28±1.5  | 3.74±0.23  | 2.49±0.29  | 62.80±6.20  | 33.50±4.42  | 421±42   | 661.92±180.19   | 379.55±96.53  | 1.770±0.31 | 26.17±4.40  | 25.42±5.44  |
| <b>T2DM+ Vehicle</b> | 5M+4F  | 23±1.5* | 3.99±0.21  | 2.81±0.25  | 57.03±4.9   | 29.59±3.29  | 427±52   | 554.80±89.25    | 359.35±110.34 | 1.66±0.52  | 15.68±2.72* | 36.34±8.75# |
| <b>T2DM+ (D+Q)</b>   | 5M+4F  | 24±0.5  | 3.63±0.30  | 2.38±0.18  | 64.098±3.42 | 34.26±2.65  | 450±47   | 606.11±136.93   | 365.24±106.30 | 1.72±0.37  | 24.08±4.23  | 25.61±6.33  |

BW= body weight

LVEDD= left ventricular-end-diastolic diameter

LVESD= left ventricular-end-systolic diameter

EF= ejection fraction

FS= fractional shortening

HR= heart rate

8 weeks p-values: BW\*= p<0.01 vs NCD and T2DM; E' velocity\*= p<0.003 vs HFD and NCD; E/E'#= p<0.008 vs HFD and NCD.

8 weeks p-values: BW\*= p<0.01 vs NCD and T2DM; E' velocity\*= p<0.0002 vs CTRL and T2DM+(D+Q); E/E'#= p<0.008 vs CTRL and T2DM+(D+Q).
